# Supplementary material for: Laccase-catalyzed functionalization of phenol-modified carbon nanotubes: from grafting of metallopolyphenols to enzyme self-immobilization
Source: Royal Society of Chemistry journal article supplement (doi:10.1039/d3ta00849e), 2023-01-01
Supplement: d3ta00849e1.pdf [file d3ta00849e1.pdf]

## Supporting Information for:

### Laccase-catalyzed functionalization of phenol-modified carbon nanotubes: from grafting of metallopolyphenols to enzyme self-immobilization

Umberto Contaldo,<sup>a</sup> Solène Gentil,<sup>a,b</sup> Elise Courvoisier-Dezord,<sup>c</sup> Pierre Rousselot-Pailley,<sup>c</sup> Fabrice Thomas<sup>a</sup>, Thierry Tron,<sup>c\*</sup> and Alan Le Goff<sup>\*a</sup>

#### 1. Materials and Methods

##### Chemicals and general procedures.

Multiwalled carbon nanotubes (MWCNT; 10 nm diameter, purity > 99%) were obtained from Sigma-Aldrich and were used as received without any purification. All the reagents were purchased from Sigma-Aldrich and were used without further purification. All solvents were of analytical grade. 4-hydroxybenzenediazonium tetrafluoroborate<sup>1</sup> and 4-ferrocenylphenol<sup>38</sup> were prepared as previously described. Distilled water was passed through a Milli-Q water purification system. The electrochemical experiments were carried out in a three-electrode electrochemical cell using a Biologic VMP3 Multi Potentiostat. The MWCNT electrodes were used as working electrodes. Pt wire was used as counter electrode and the reference electrode was based on the Ag/AgClO<sub>4</sub> 10<sup>-2</sup> M reference electrode in MeCN and Ag/AgCl in water. All potentials are given versus Fc/Fc<sup>+</sup> in MeCN and the standard hydrogen electrode in water ( $E^{\circ}_{\text{Ag/AgCl (KCl sat)}} = +0.197 \text{ V vs NHE at } 25^{\circ}\text{C}$ ). All current densities are normalized towards the geometrical surface of the glassy carbon electrode (0.071 cm<sup>2</sup>). Experiments were repeated on at least three electrodes.

The X-band EPR spectra were recorded on an EMX plus spectrometer equipped with a high sensitivity cavity and a Bruker nitrogen flow cryostat. Spectra were simulated using the Easyspin software package<sup>2</sup> operating in Matlab. First, MWCNTs were chemically-modified with 4-hydroxybenzenediazonium tetrafluoroborate according to a previously-described procedure.<sup>3,4</sup> 200  $\mu\text{L}$  of 1 mg mL<sup>-1</sup> dispersion of phenol-modified MWCNTs were prepared in 100 mM Acetate buffer (pH 5.5), 100 mM DMPO and 10 % DMSO. Laccase (2  $\mu\text{L}$  of a 150  $\mu\text{M}$  stock solution) was injected in the EPR tube and subsequently frozen at 100 K.

XPS analysis was performed using a Thermoelectron ESCALAB 250 device (ICGM, France). The X-ray excitation was provided by a monochromatic Al-K $\alpha$  ( $h\nu=1486.6 \text{ eV}$ ) source. The analyzed area was  $\sim 0.15 \text{ mm}^2$ . The background signal was removed using the Shirley<sup>5</sup> method. The surface atomic concentrations were determined from photoelectron peaks areas using the atomic sensitivity factors reported by Scofield<sup>6</sup>. Binding energies (BE) of all core levels were referred to the C=C of C1s carbon at 284.4 eV. *Caution: Perchlorate salts present a potential explosion risk; use with caution!*

***UV-visible spectroscopy of reactivity of laccase with 4-ferrocenylphenol (FcPhOH).*** For all spectroscopical analysis was used spectrophotometer Lambda 650 (Perkin Elmer). The quartz glass cuvette (Hellma® Micro Cuvette, QS Quartz) was prepared with: 20  $\mu\text{L}$  of 1 mM FcPhOH in 100% DMSO and 960  $\mu\text{L}$  of 0.1 M Acetate buffer, pH 5.5. An FcPhOH spectrum was first recorded, after baseline correction (0.1 M Acetate buffer, pH 5.5, 2 % DMSO). Then 20  $\mu\text{L}$  of Laccase 150  $\mu\text{M}$  in 50 mM Acetate buffer, pH 5 was injected into the cuvette, mixed and then a spectrum was recorded after a total time of 2 minutes and then each 5 minutes thereafter.

A single wave time evolution,  $\lambda = 350 \text{ nm}$ , of the reactivity of the laccase with FcPhOH was recorded by injection of 20  $\mu\text{L}$  of Laccase 150  $\mu\text{M}$  in 50 mM Acetate buffer, pH 5 into the cuvette filled with 980  $\mu\text{L}$  of 0.1M Acetate buffer, pH 5.5, 20  $\mu\text{M}$  FcPhOH.

### ***MALDI-TOF MS experiments***

The MALDI-TOF experiments were performed with a Bruker Daltonics Autoflex Speed mass spectrometer in reflectron positive mode. Dithranol was used as matrix. The matrix solution was prepared by dissolving dithranol in tetrahydrofuran (THF) ( $2 \text{ mg ml}^{-1}$ ). Samples were diluted in THF. 2  $\mu\text{l}$  of the sample solution were mixed with 4  $\mu\text{l}$  of matrix solution then 1  $\mu\text{l}$  of the mixture solution was deposited onto the MALDI target plate and dried at room temperature. Calibration was performed externally by using a peptide calibration mixture (Peptide Calibration Standard II -Bruker Daltonics).

### ***Preparation of MWCNT electrode modified with 4-hydroxybenzenediazonium tetrafluoroborate and laccase***

MWCNT film were prepared by drop coating 20  $\mu\text{L}$  of a 5  $\text{mg mL}^{-1}$  dispersion of MWCNTs in 1-Methyl-2-pyrrolidinone (NMP) onto the glassy carbon (GC) electrode surface. The deposit was then allowed to dry under vacuum.

Electrografting of 4-hydroxybenzenediazonium on the surface of the MWCNT electrode was performed by cyclic voltammetry in MeCN with 0.1 M tetrabutylammonium hexafluorophosphate (TBAP) as the supporting electrolyte.

The modified MWCNT GC electrode were then incubated in 20  $\mu\text{L}$  of Lac3 solution (70  $\mu\text{M}$  in Acetate buffer 50 mM pH 5) for 6 h at 4°C.

Figure S1. XPS survey spectra the phenol-modified MWCNT electrodes modified with FcPhOH in the (a) presence and (b) absence of laccase.

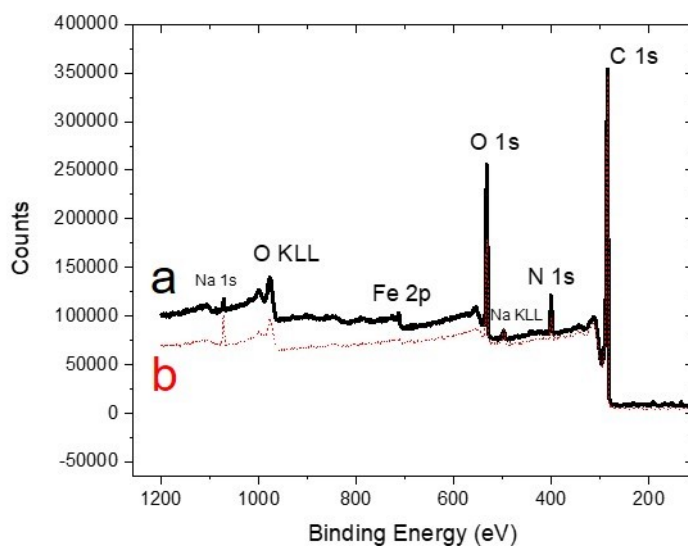

## References

- (1) Schmidt, B.; Hölter, F.; Berger, R.; Jessel, S. Mizoroki–Heck Reactions with 4-Phenoldiazonium Salts. *Advanced Synthesis & Catalysis* **2010**, 352 (14–15), 2463–2473. <https://doi.org/10.1002/adsc.201000493>.
- (2) Stoll, S.; Schweiger, A. EasySpin, a Comprehensive Software Package for Spectral Simulation and Analysis in EPR. *Journal of Magnetic Resonance* **2006**, 178 (1), 42–55. <https://doi.org/10.1016/j.jmr.2005.08.013>.
- (3) Bahr, J. L.; Tour, J. M. Highly Functionalized Carbon Nanotubes Using in Situ Generated Diazonium Compounds. *Chem. Mater.* **2001**, 3823–3824.
- (4) Lalaoui, N.; Poulpiquet, A. de; Haddad, R.; Le Goff, A.; Holzinger, M.; Gounel, S.; Mermoux, M.; Infossi, P.; Mano, N.; Lojou, E.; Cosnier, S. A Membraneless Air-Breathing Hydrogen Biofuel Cell Based on Direct Wiring of Thermostable Enzymes on Carbon Nanotube Electrodes. *Chem. Commun.* **2015**, 51 (35), 7447–7450. <https://doi.org/10.1039/C5CC02166A>.
- (5) Shirley, D. A. High-Resolution X-Ray Photoemission Spectrum of the Valence Bands of Gold. *Phys. Rev. B* **1972**, 5 (12), 4709–4714. <https://doi.org/10.1103/PhysRevB.5.4709>.
- (6) Scofield, J. H. Hartree-Slater Subshell Photoionization Cross-Sections at 1254 and 1487 EV. *Journal of Electron Spectroscopy and Related Phenomena* **1976**, 8 (2), 129–137. [https://doi.org/10.1016/0368-2048\(76\)80015-1](https://doi.org/10.1016/0368-2048(76)80015-1).
